# Supplementary material for: Fabrication of Piezoelectric Electrospun Termite Nest-like 3D Scaffolds for Tissue Engineering
Source: MDPI journal article supplement (doi:10.3390/ma14247684), 2021-12-13
Supplement: s1 [file s1]

# Fabrication of Piezoelectric Electrospun Termite Nest-like 3D Scaffolds for Tissue Engineering

Thanapon Muenwacha <sup>1,2</sup>, Oratai Weeranantanapan <sup>3,4</sup>, Nuannoi Chudapongse <sup>3,4</sup>, Francisco Javier Diaz Sanchez <sup>5</sup>, Santi Maensiri <sup>1,4,6</sup>, Norbert Radacsi <sup>5,\*</sup> and Wiwat Nuansing <sup>1,4,6,\*</sup>

<sup>1</sup> Institute of Science, School of Physics, Suranaree University of Technology, Nakhon Ratchasima 30000, Thailand; t.muenwacha@gmail.com (T.M.); santimaensiri@g.sut.ac.th (S.M.)

<sup>2</sup> Thailand Center of Excellence in Physics (ThEP), Ministry of Higher Education, Science, Research and Innovation, Bangkok 10400, Thailand

<sup>3</sup> Institute of Science, School of Preclinical Sciences, Suranaree University of Technology, Nakhon Ratchasima 30000, Thailand; oratai@sut.ac.th (O.W.); nuannoi@sut.ac.th (N.C.)

<sup>4</sup> Center of Excellence on Advanced Functional Materials (CoE-AFM), Suranaree University of Technology, Nakhon Ratchasima 30000, Thailand

<sup>5</sup> Institute for Materials and Processes, School of Engineering, The University of Edinburgh, Robert Stevenson Road, Edinburgh EH9 3FB, UK; s1673949@sms.ed.ac.uk

<sup>6</sup> Research Network NANOTEC—SUT on Advanced Nanomaterials and Characterization, Suranaree University of Technology, Nakhon Ratchasima 30000, Thailand

\* Correspondence: N.Radacsi@ed.ac.uk (N.R.); w.nuansing@g.sut.ac.th (W.N.); Tel.: +44-(0)-131-651-7112 (N.R.); +66-(0)-6254-55630 (W.N.)

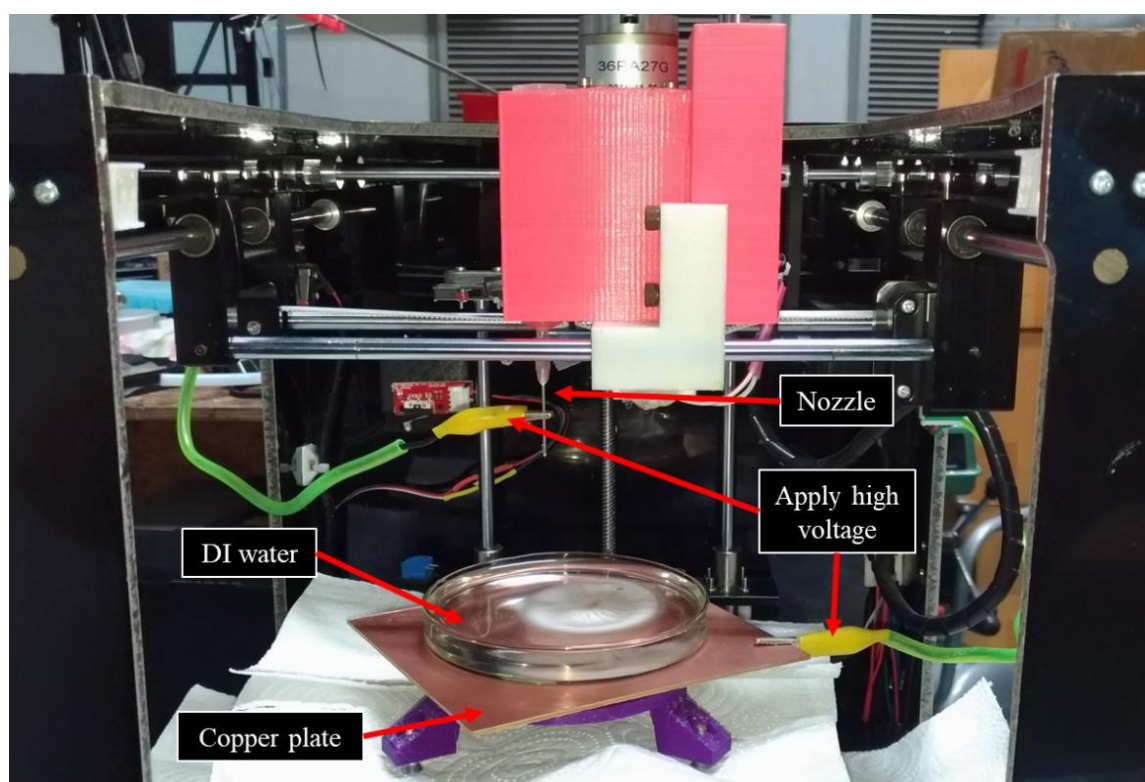

Figure S1. Photograph of the 3D electrospinning setup with a water-collecting bath.

**Table S1.** The production of PVDF-HFP 3D nanofibers structure.

| Concentration<br>(wt%) | HV<br>(kV) | Diameter<br>(nm) | Beads | 3D structure |
|------------------------|------------|------------------|-------|--------------|
| 10                     | 15.5       | $441 \pm 18$     | Yes   | No           |
| 13                     | 12.8       | $451 \pm 16$     | Yes   | No           |
| 15                     | 10         | $802 \pm 23$     | No    | Yes          |
| 17                     | 9.2        | $1256 \pm 43$    | No    | Yes          |
| 20                     | 7.1        | $1277 \pm 32$    | No    | No           |

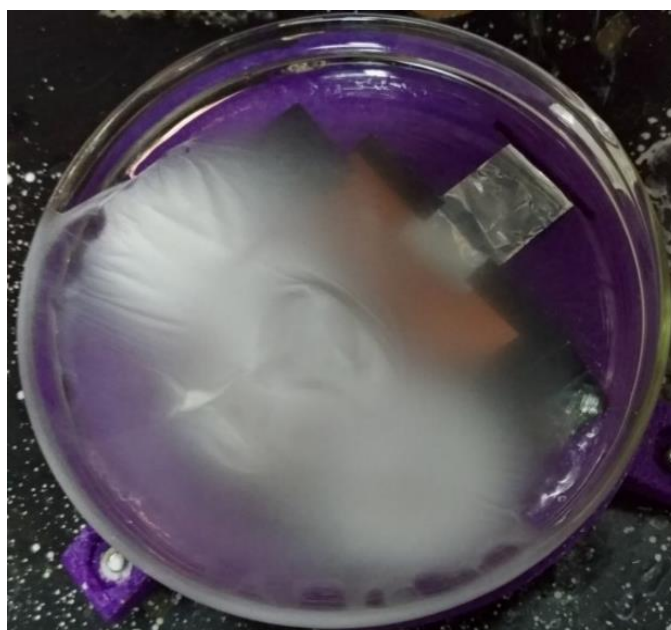**Figure S2.** The fibers cover on the water surface when distance between the tip of the needle and the water surface was changed from 5 to 10 cm.

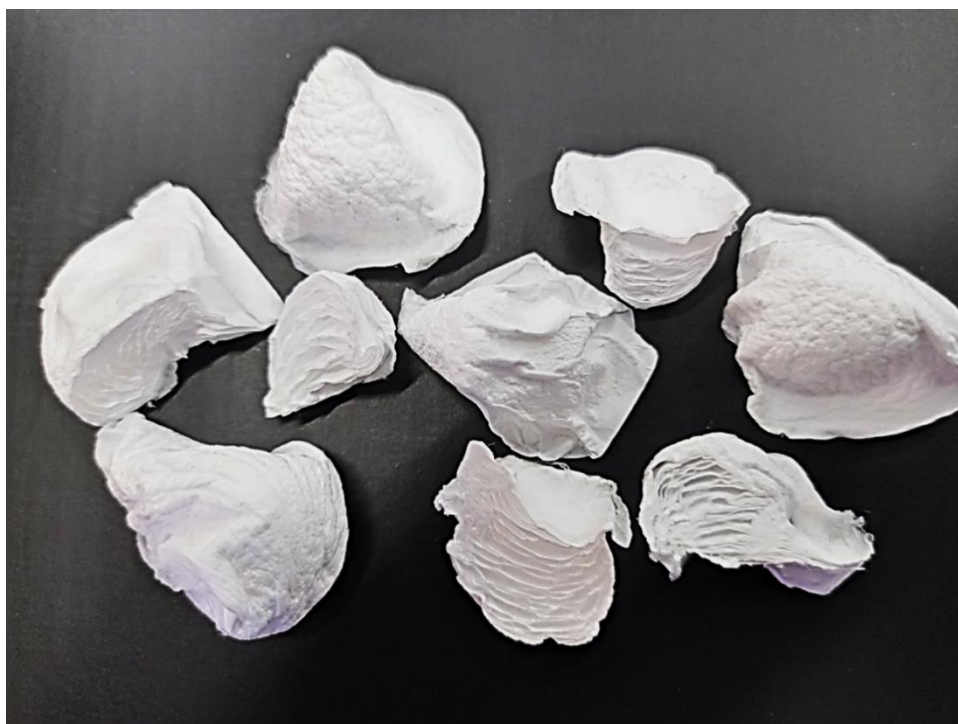

**Figure S3.** The termite nest-like 3D scaffold can be reproduced.

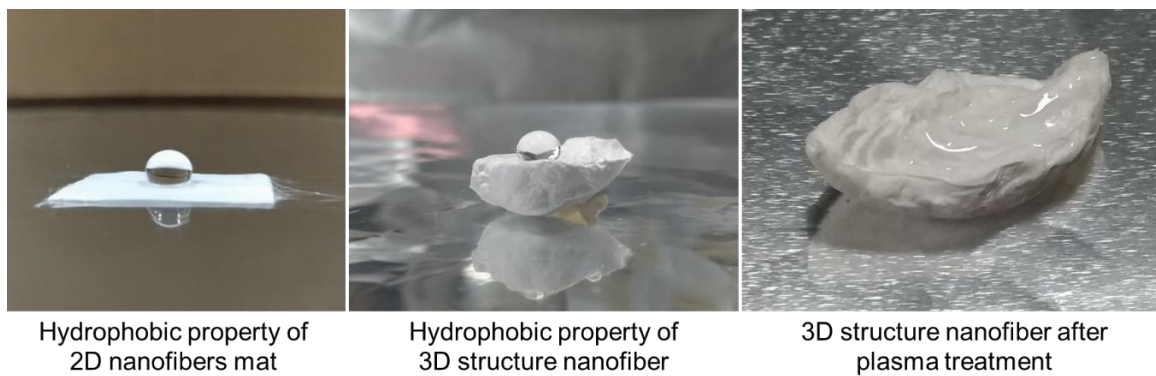

Hydrophobic property of  
2D nanofibers mat

Hydrophobic property of  
3D structure nanofiber

3D structure nanofiber after  
plasma treatment

**Figure S4.** The water drops on the PVDF-HFP 2D and 3D nanofiber.

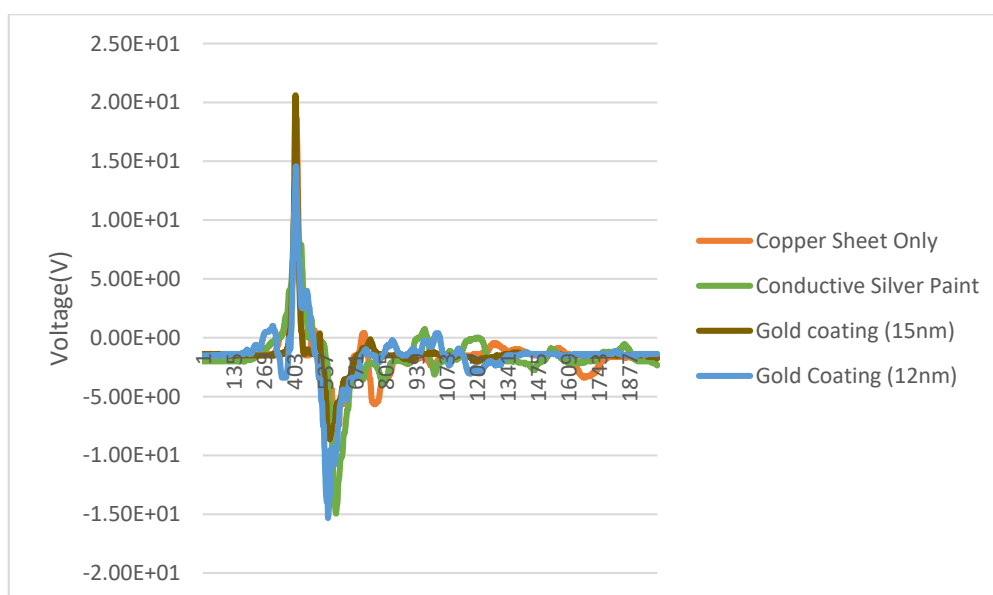

**Figure S5.** Open voltage response as a function of electrode attachment to the piezoelectric fibers.

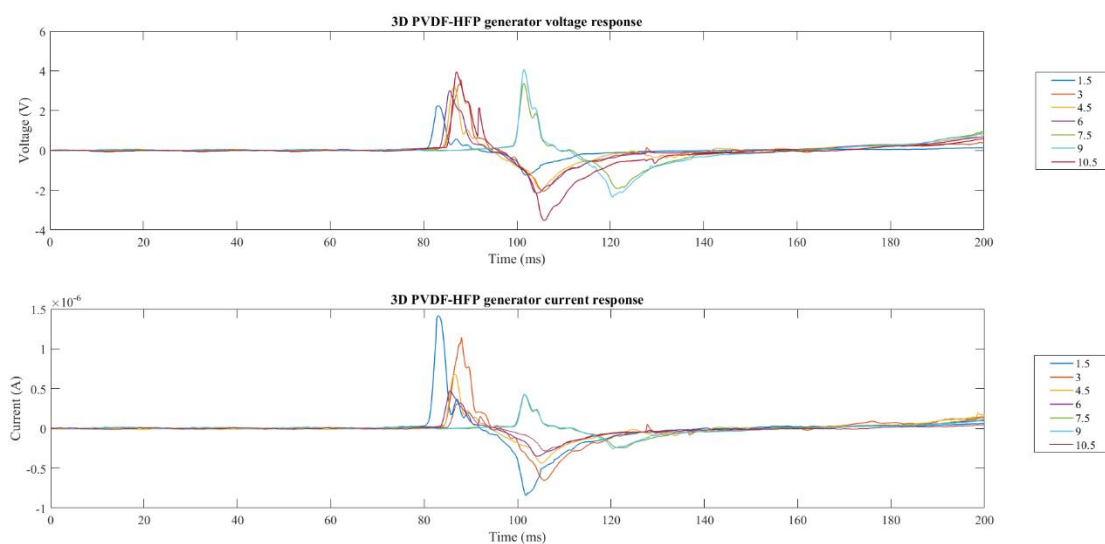

**Figure S6.** Voltage and current response of the 3D PVDF-HFP generator when a 100 g weight was dropped on its surface from a height of 5 cm and for different load conditions. The resistive loads used ranged from of 1.5 MΩ to 9 MΩ, in 1.5 MΩ increments.
